# Supplementary material
Source: bioRxiv or medRxiv preprint supplement (https://www.biorxiv.org/content/biorxiv/early/2019/01/21/526939/DC1/embed/media-1.pdf)
Supplement: Supplementary file [file media-1.pdf]

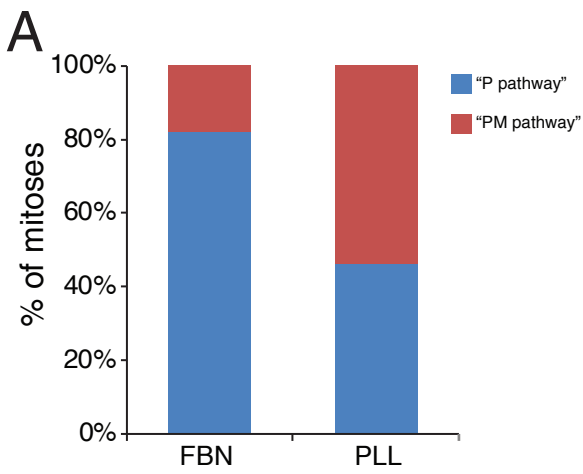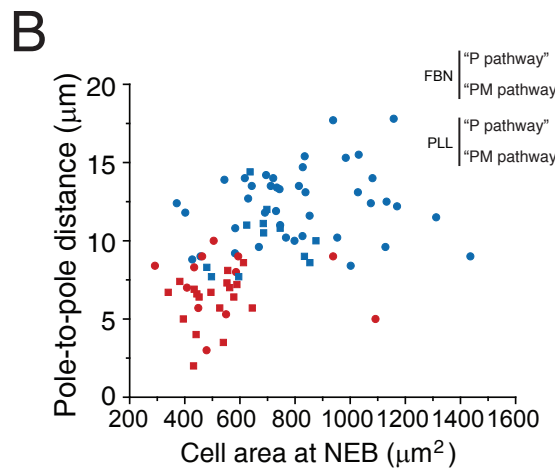

Supplementary Figure 1

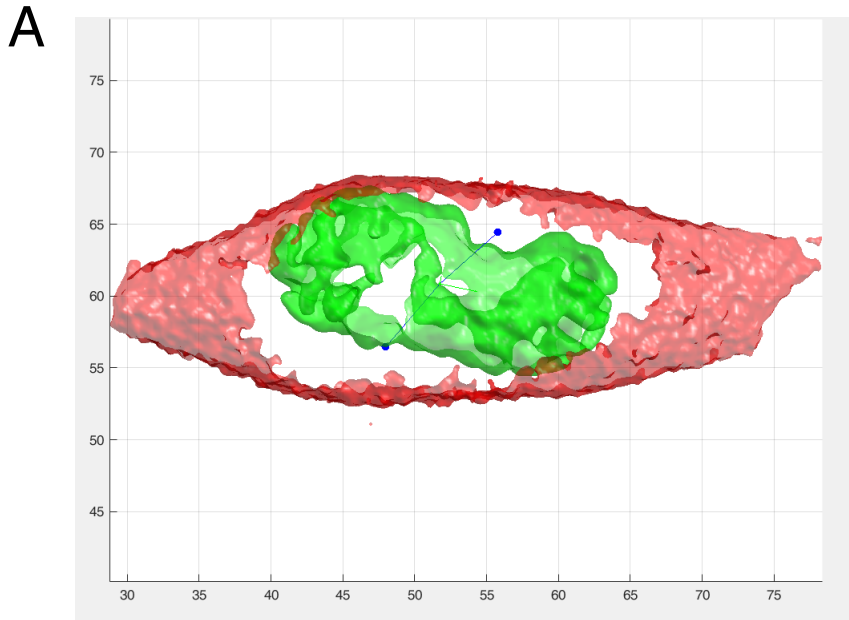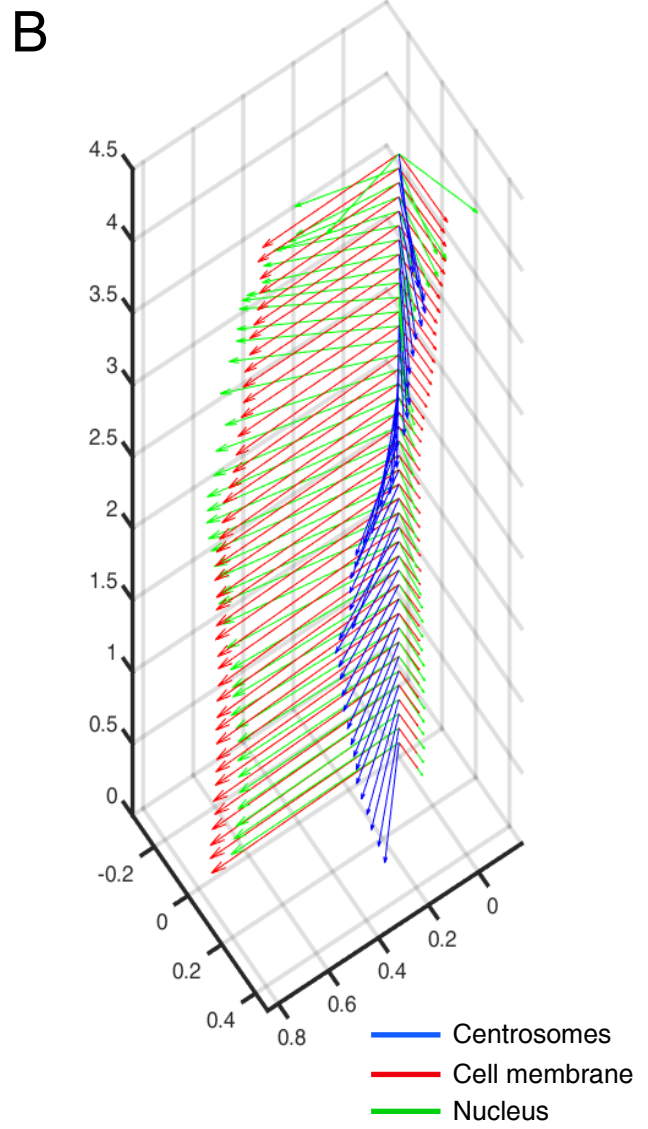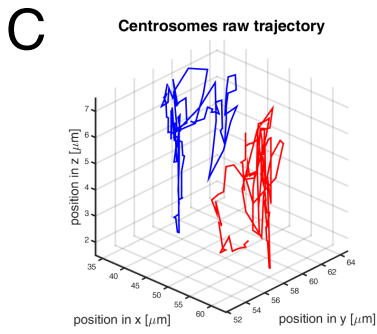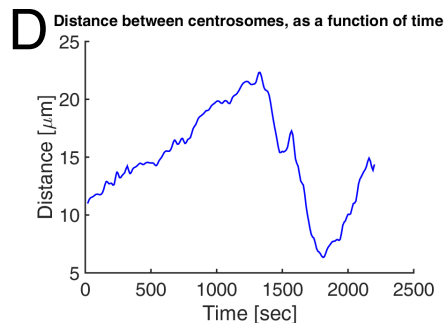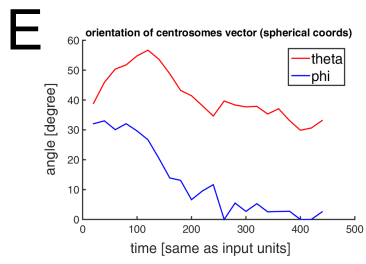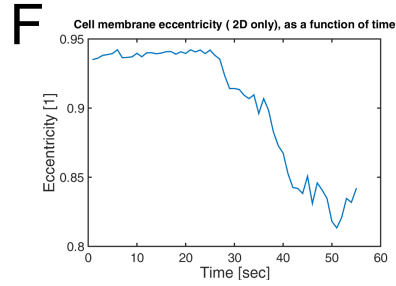

Supplementary Figure 2

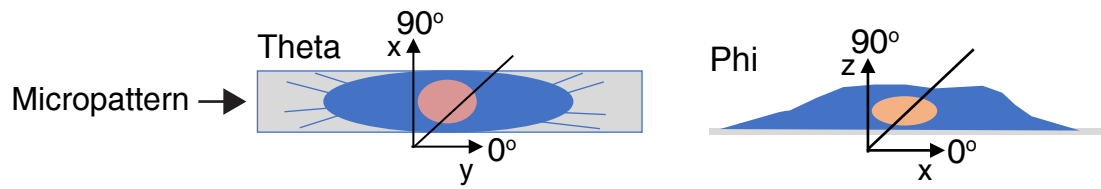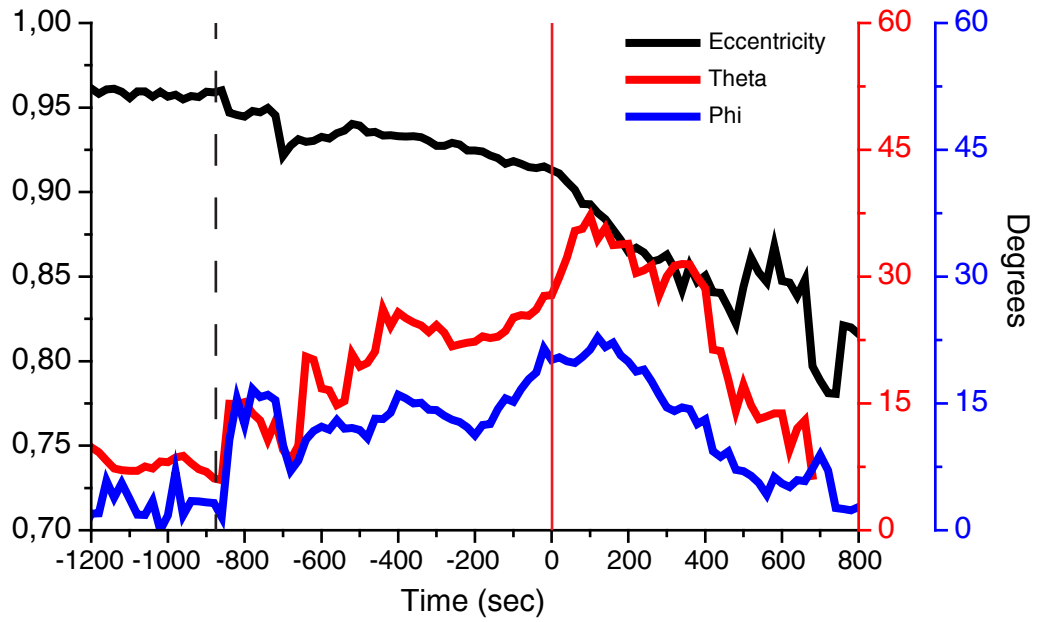

Supplementary Figure 3

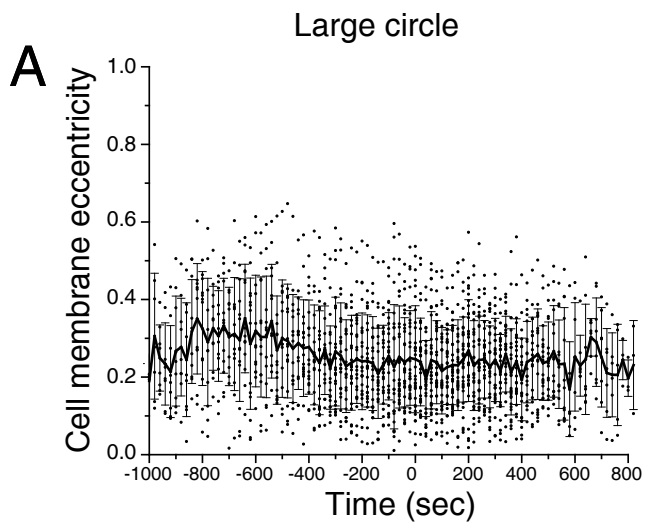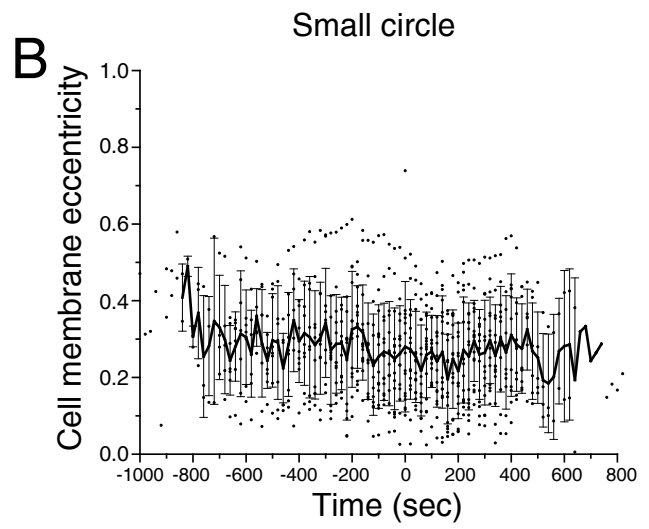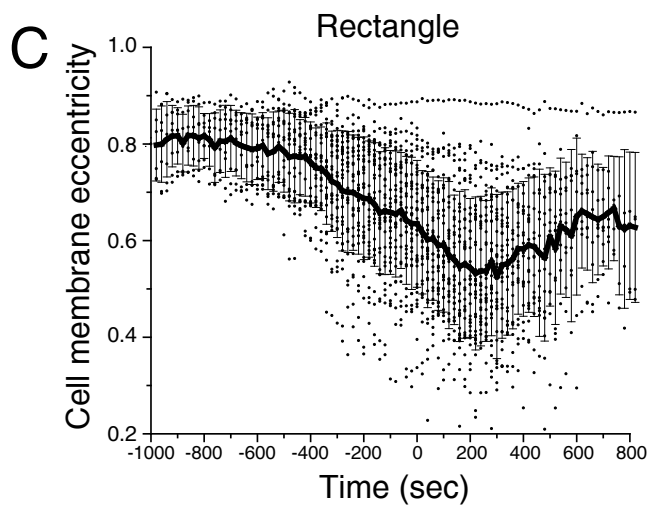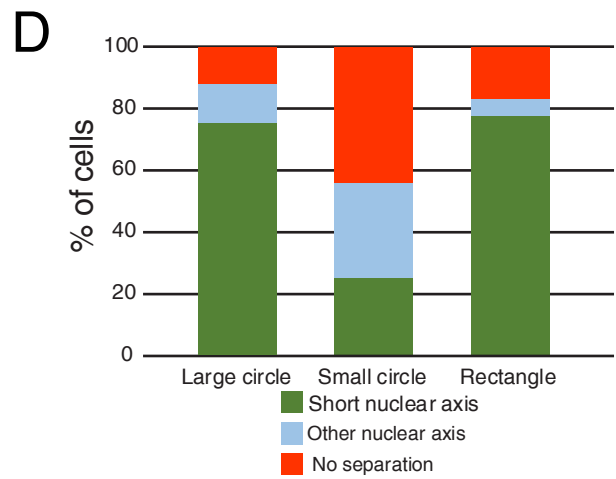

Supplementary Figure 4



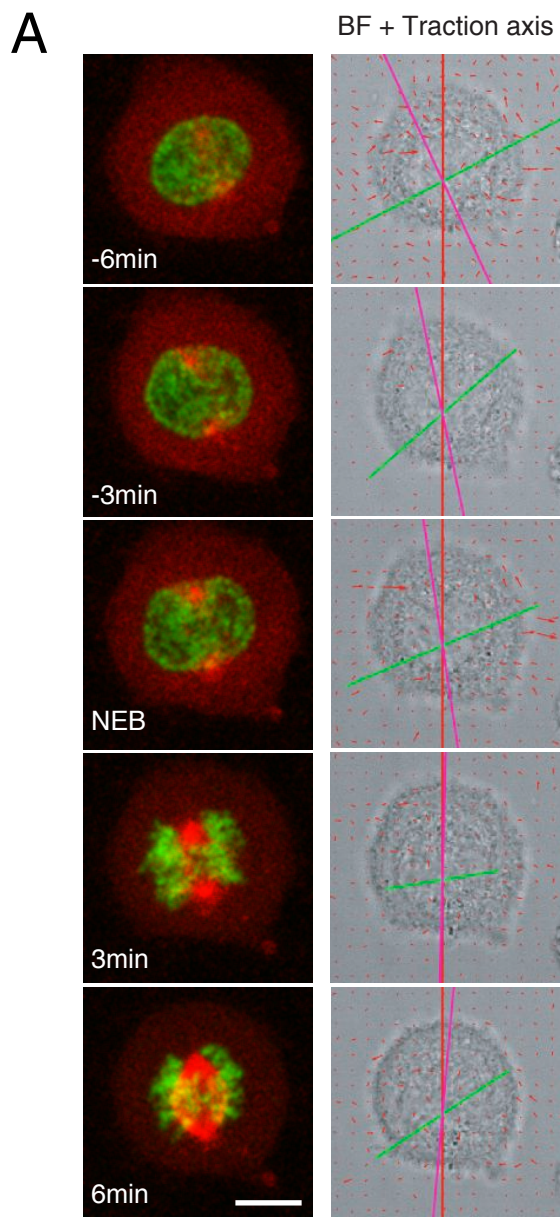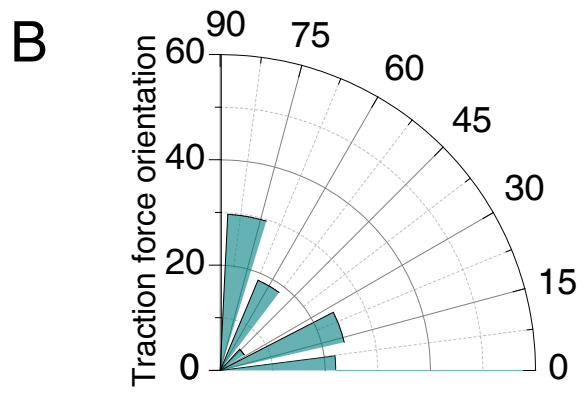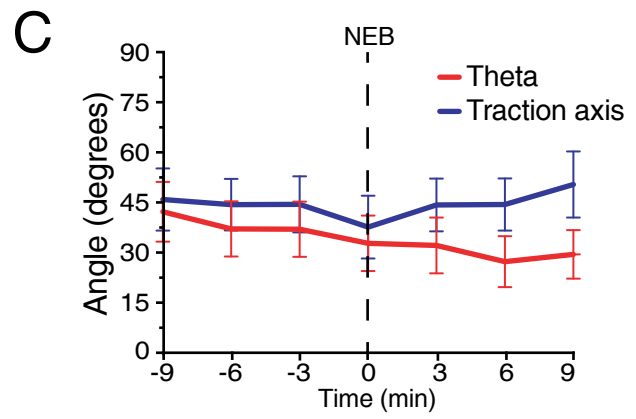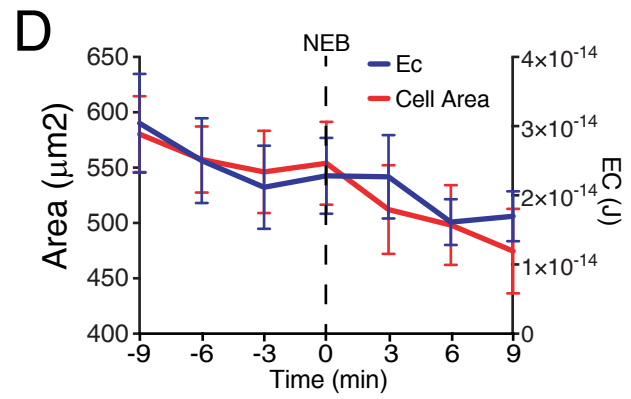

Supplementary Figure 5

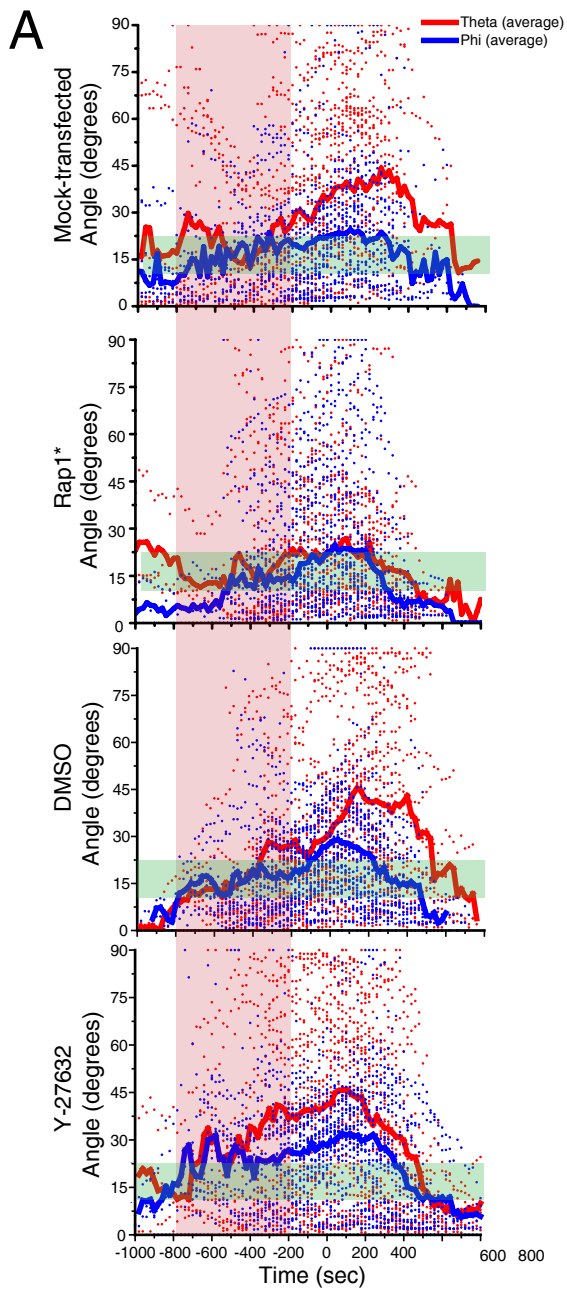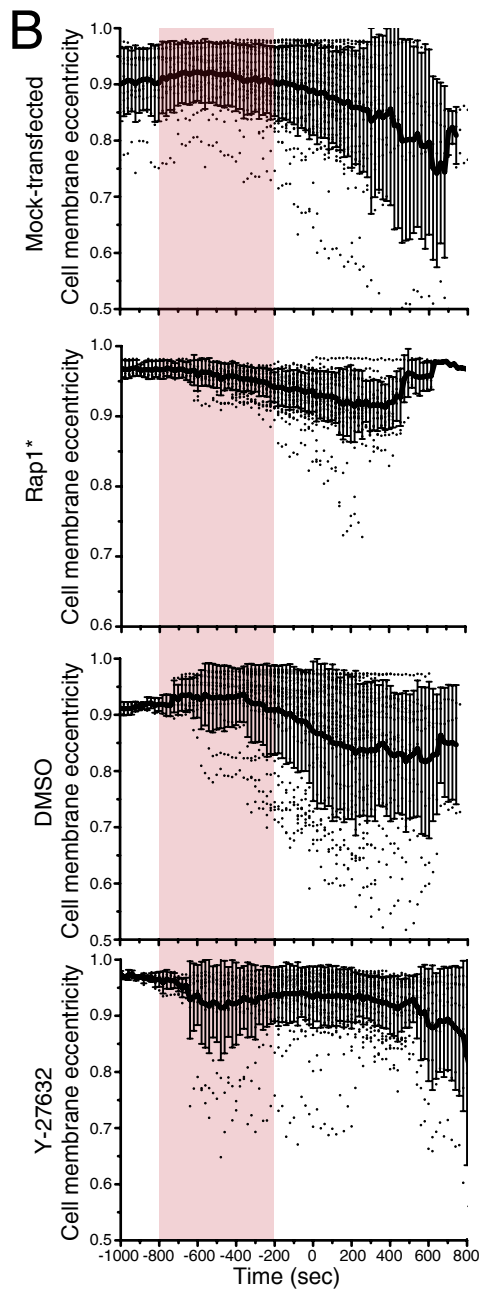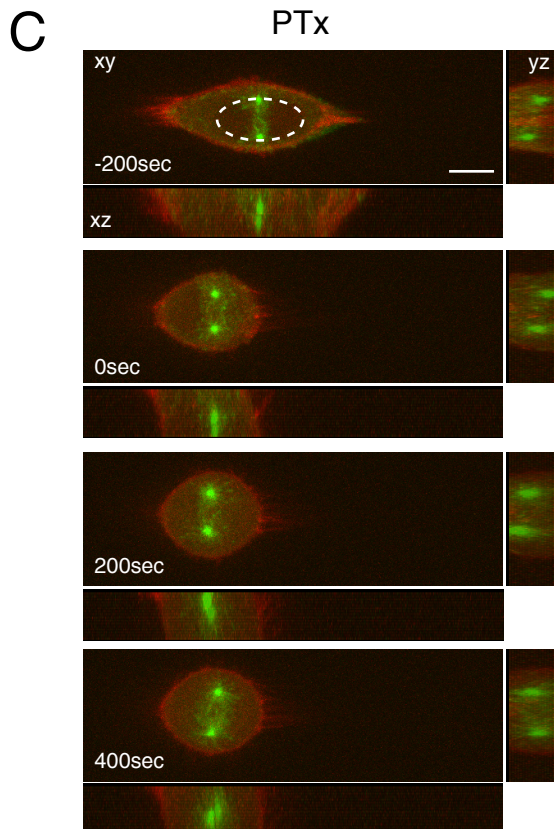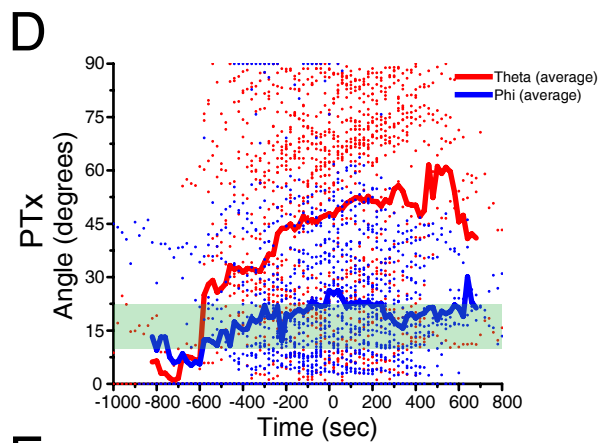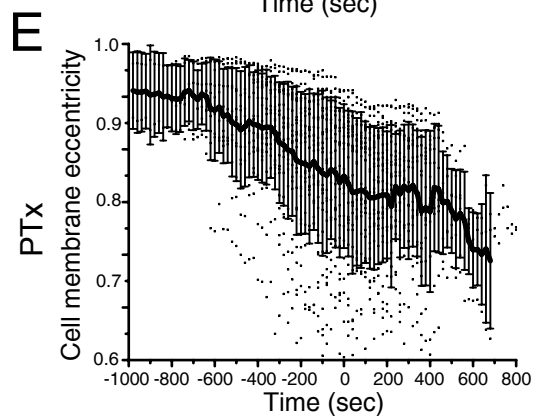

Supplementary Figure 6

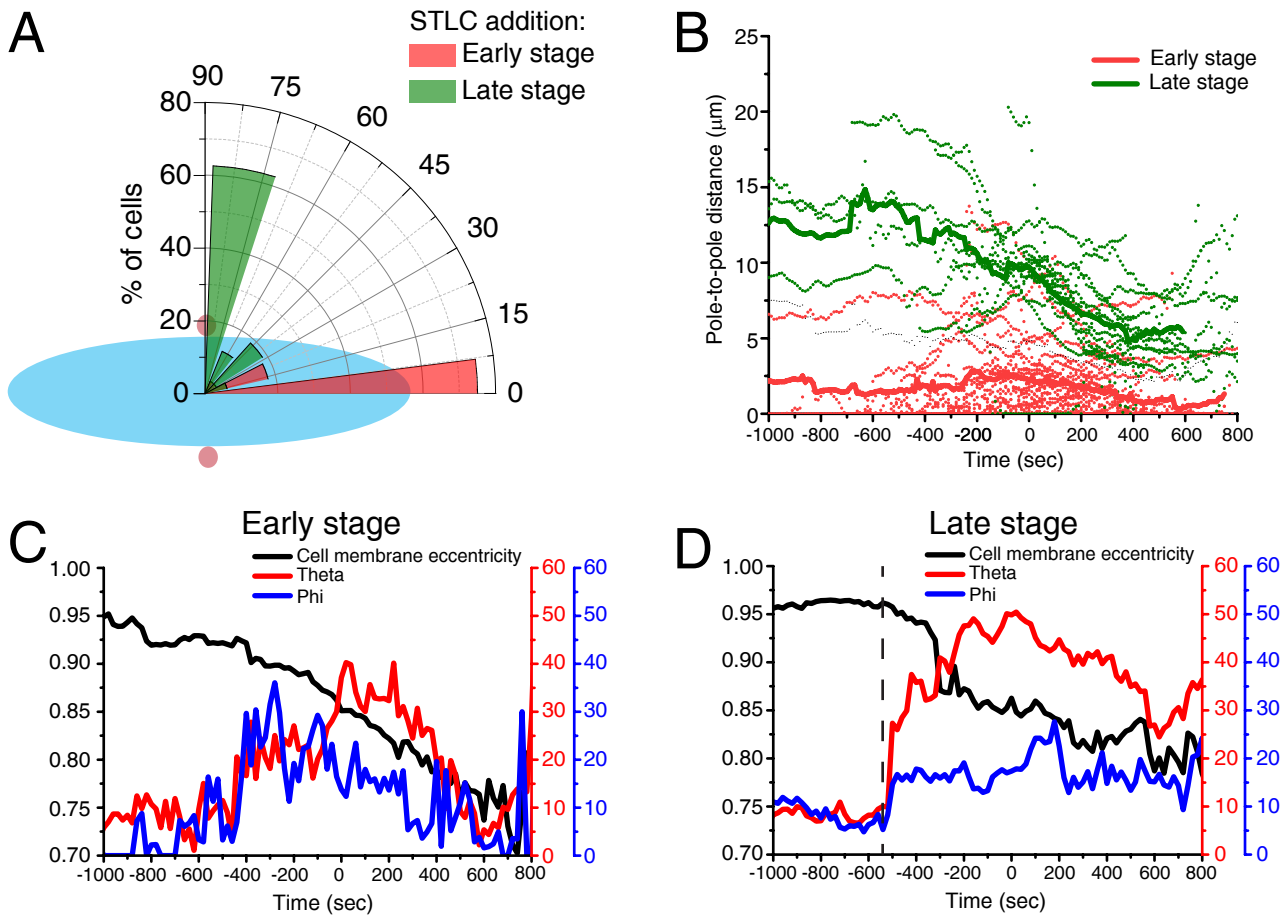

Supplementary Figure 7

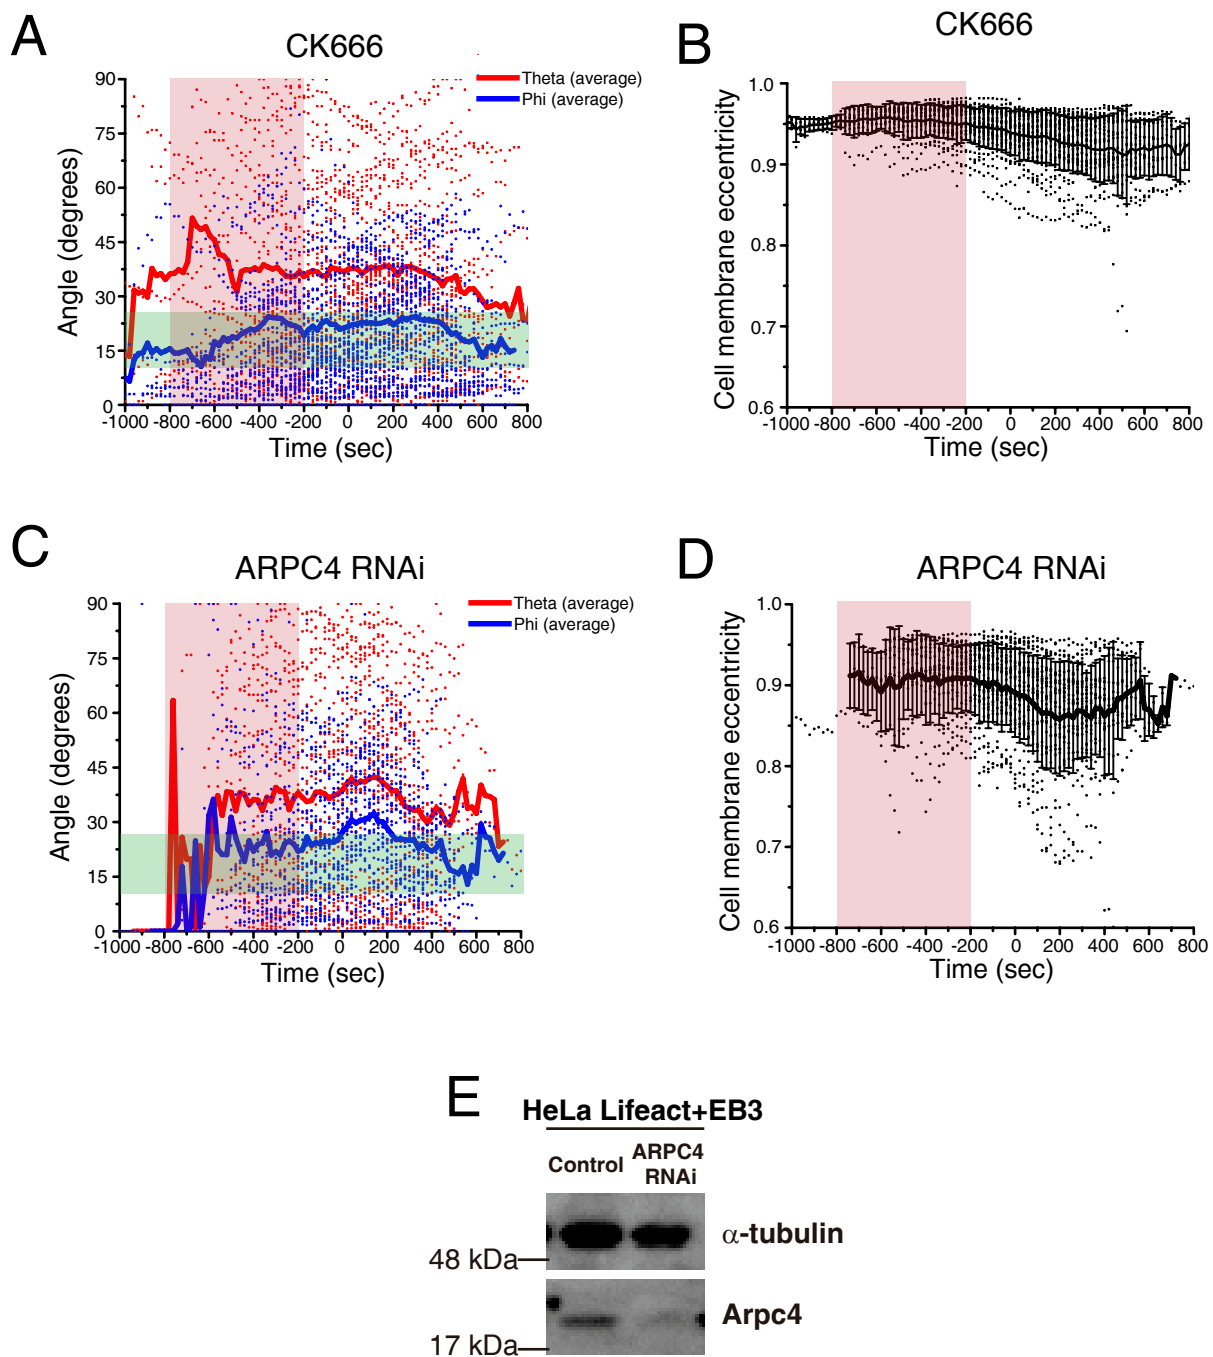

Supplementary Figure 8

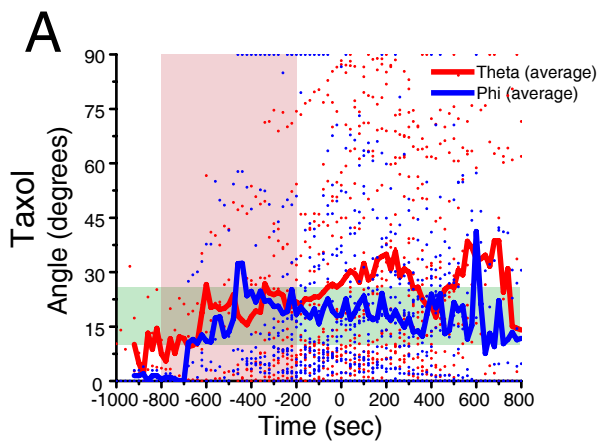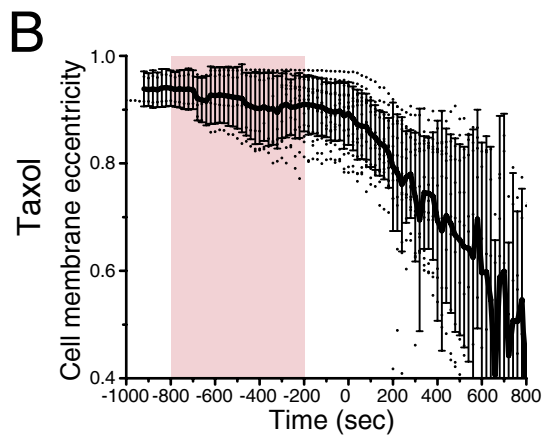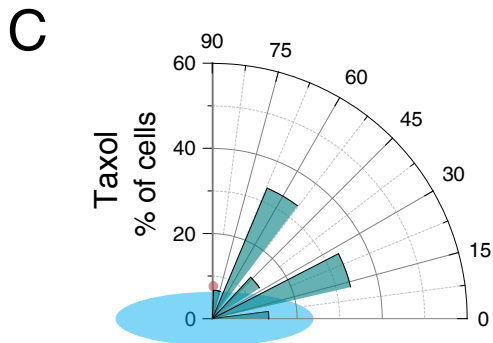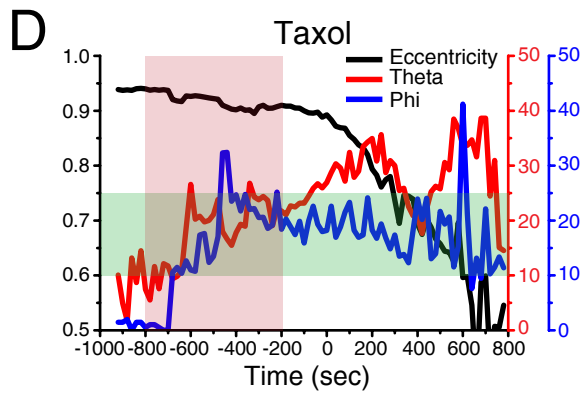

Supplementary Figure 9

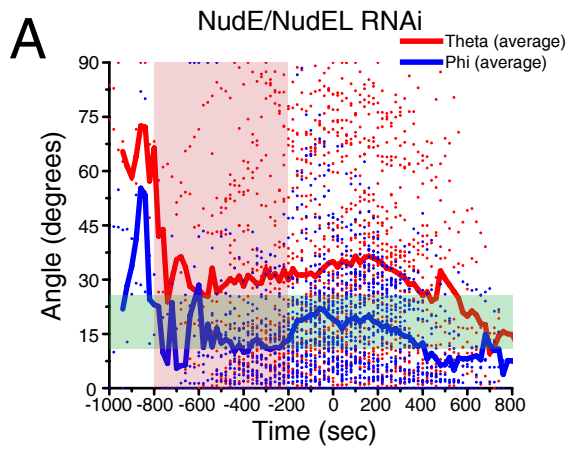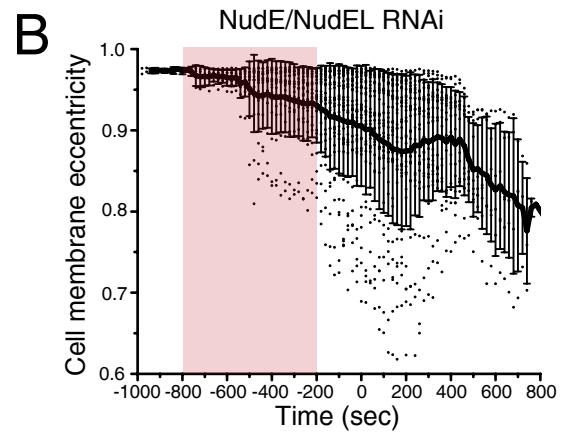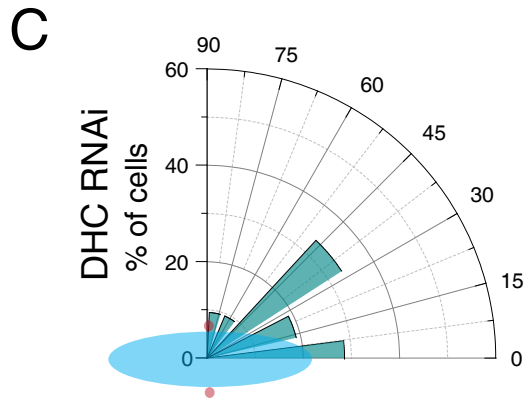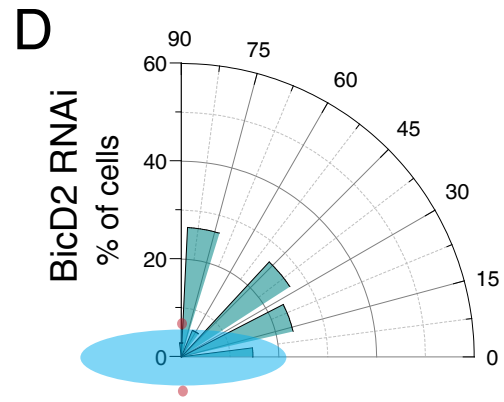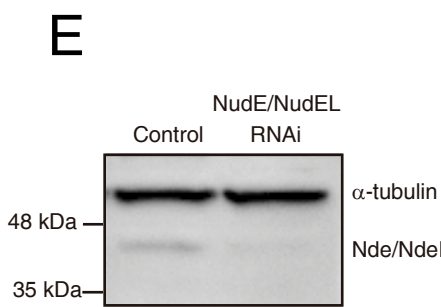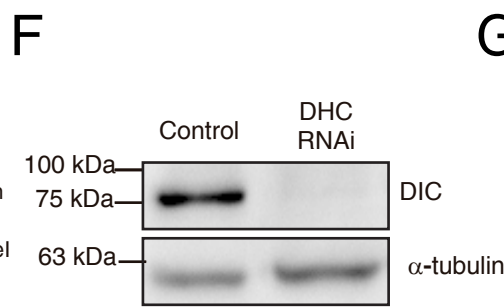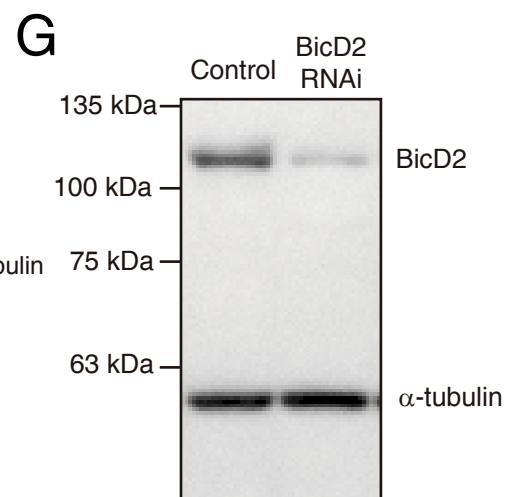

Supplementary Figure 10



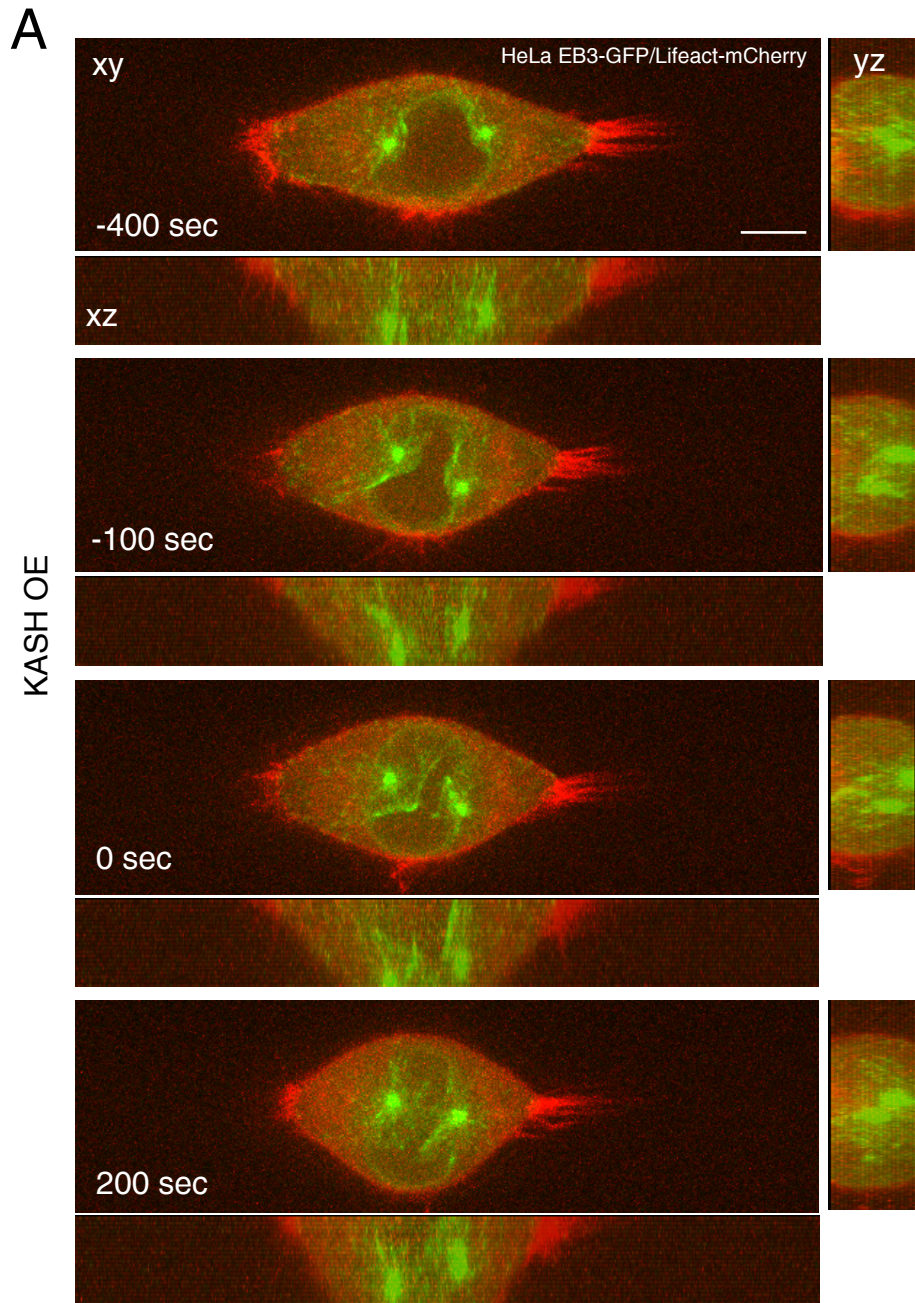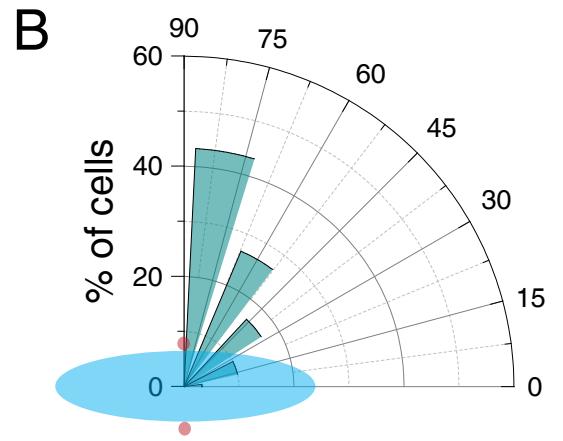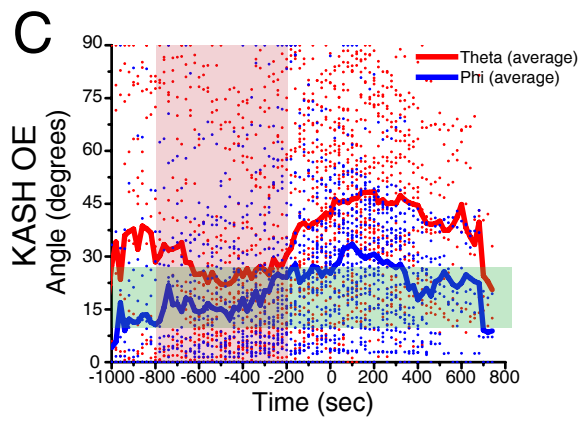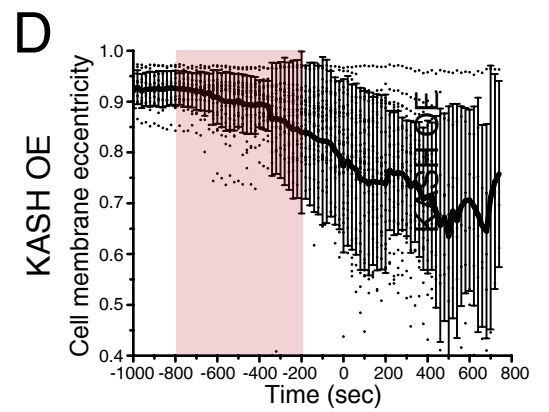

Supplementary Figure 11

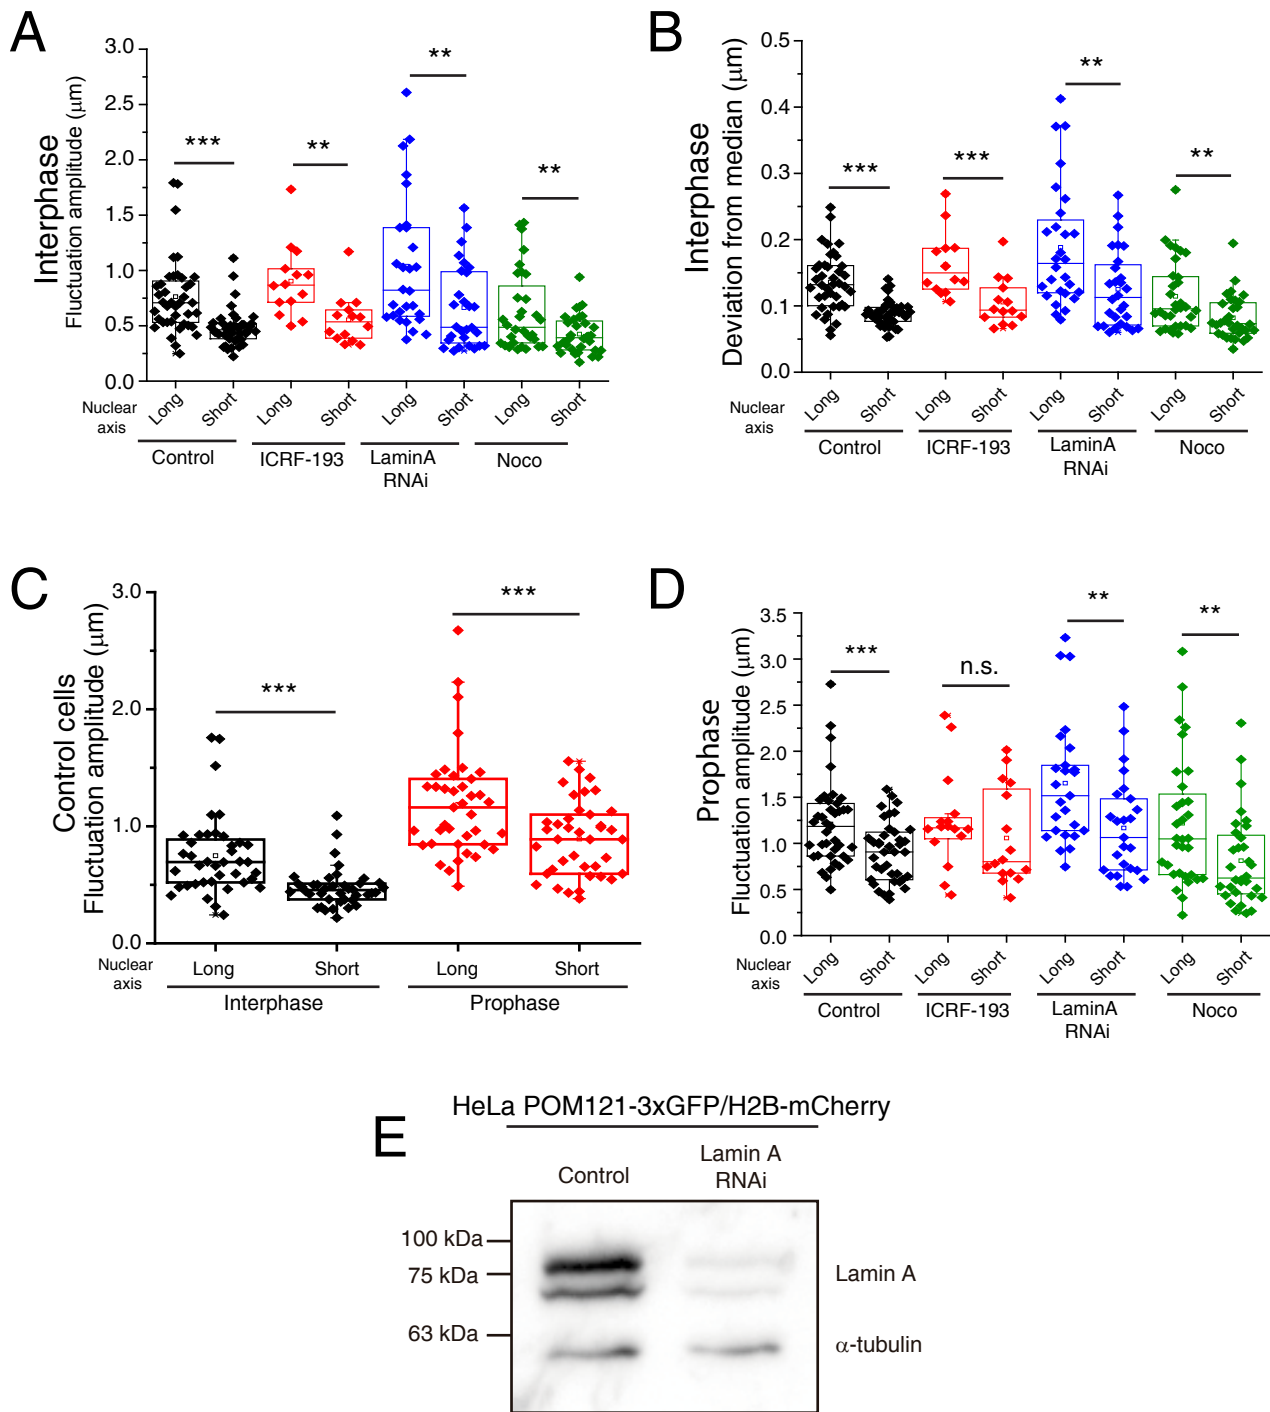

Supplementary Figure 12



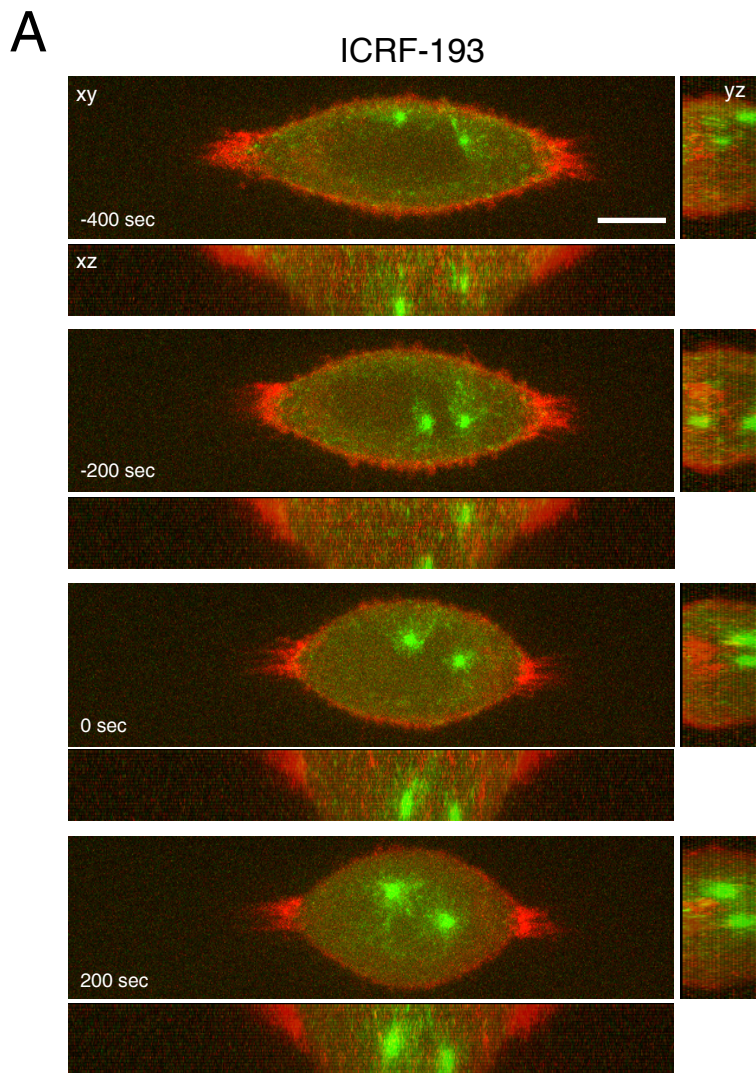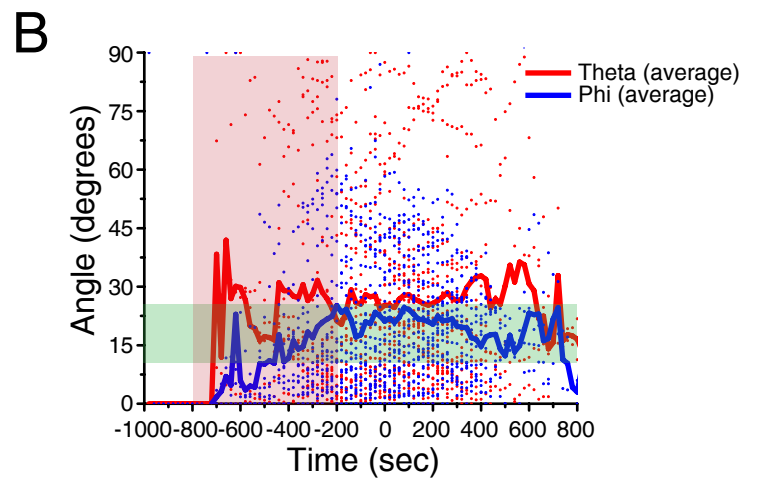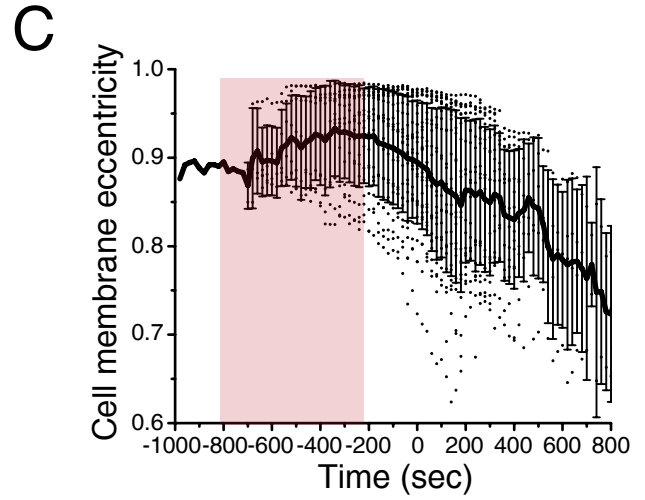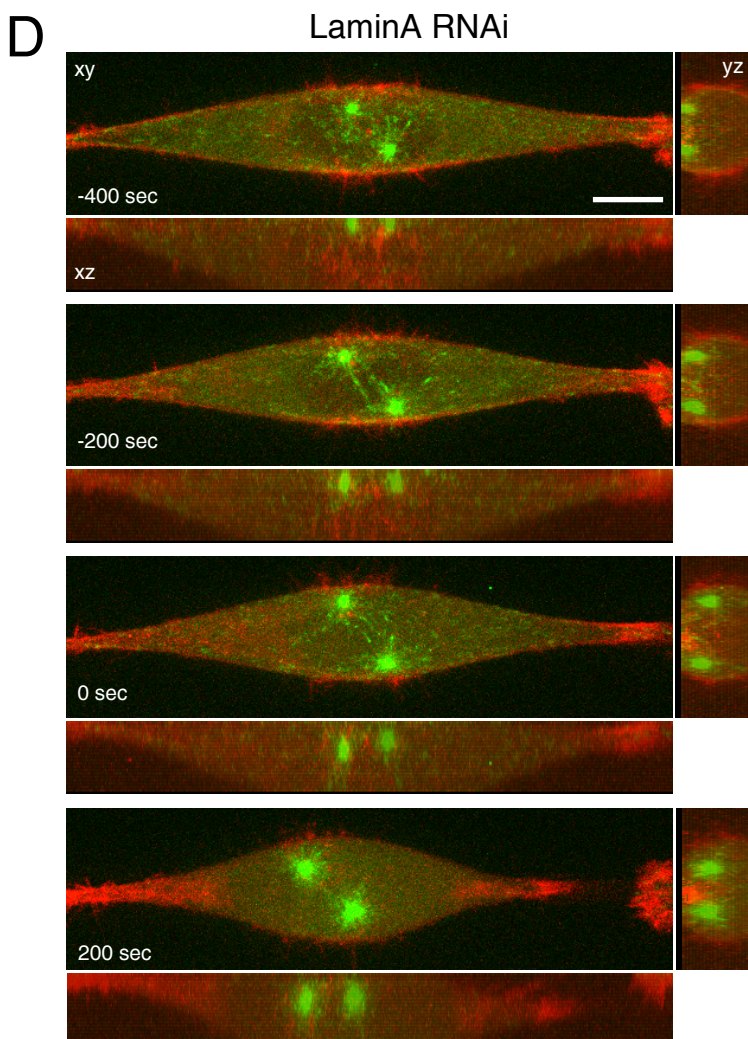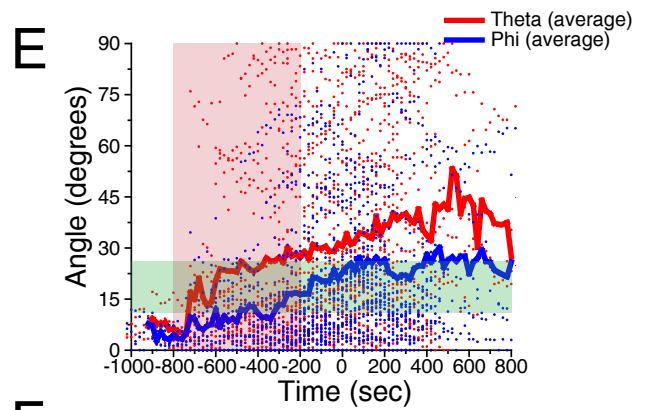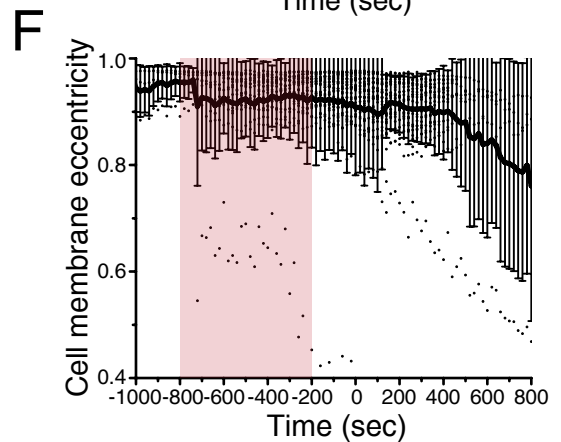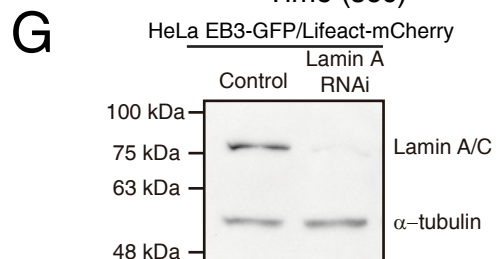

Supplementary Figure 13

**A**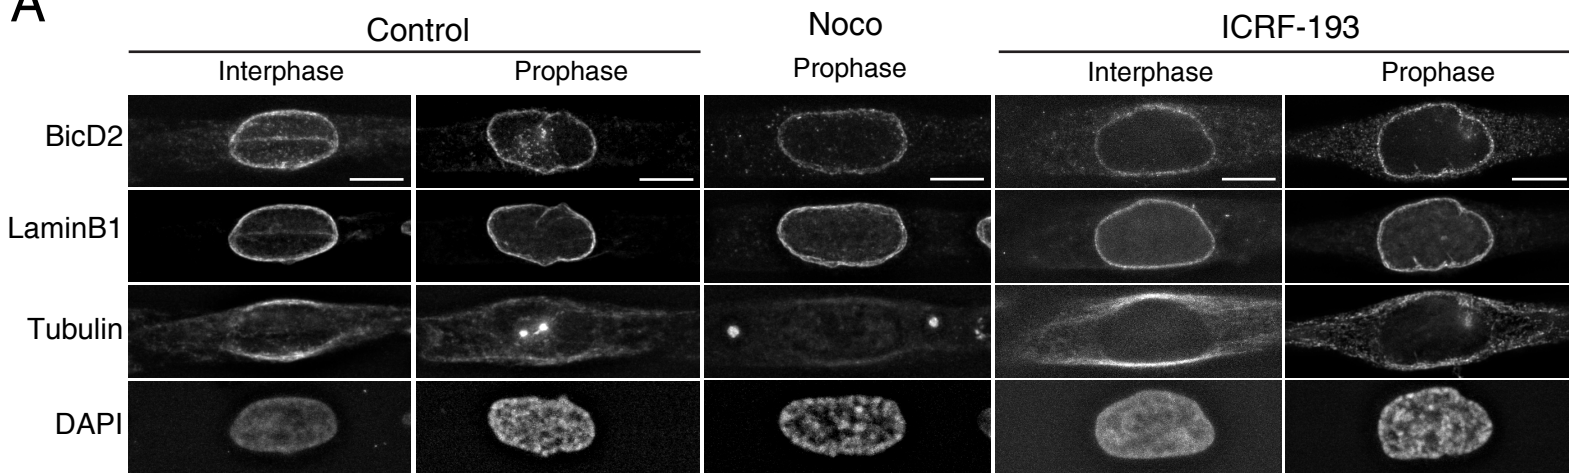**B**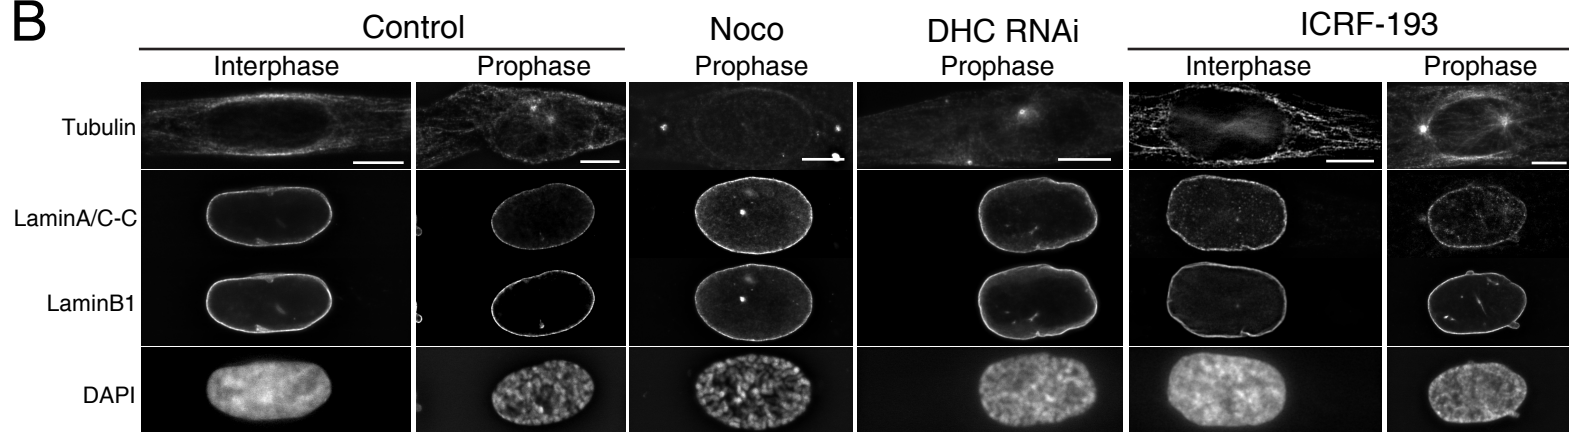

Supplementary Figure 14

**A**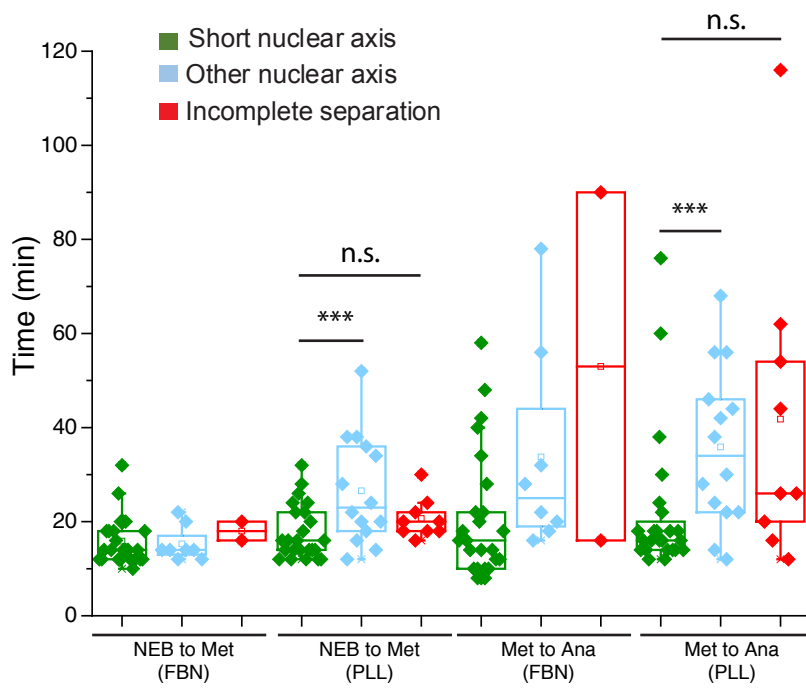**B**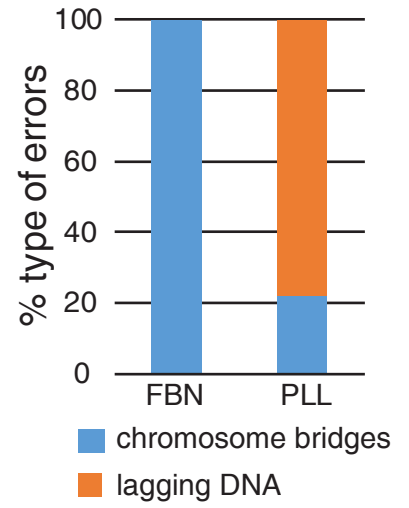**C**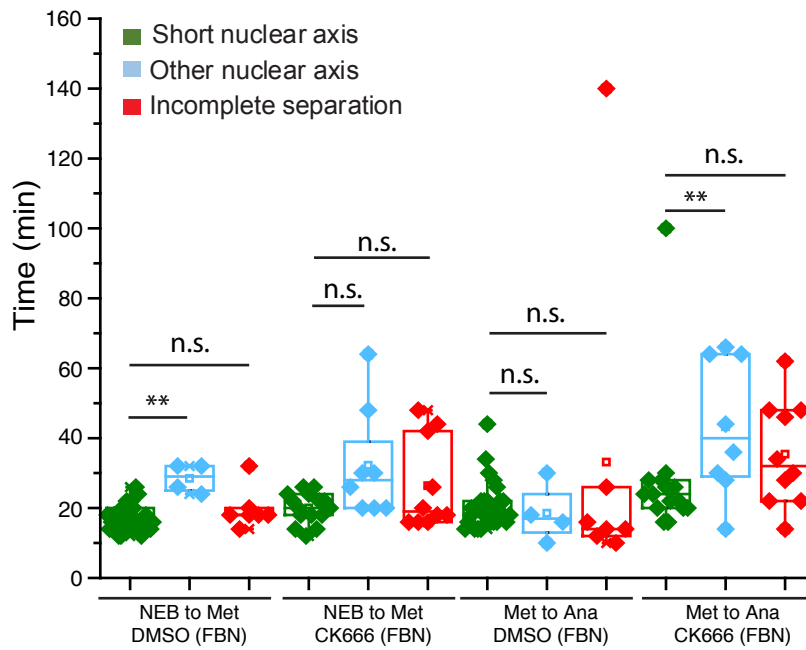**D**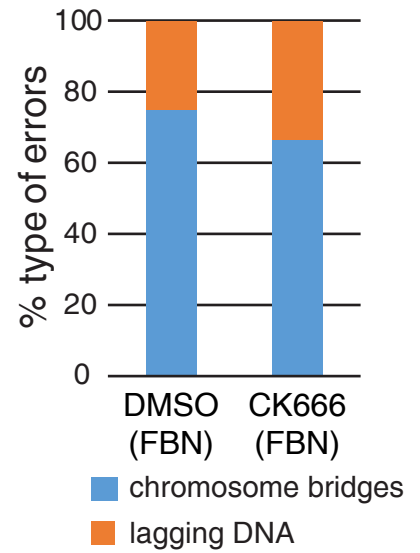

Supplementary Figure 15
